# Supplementary material
Source: MDPI journal article supplement (https://www.mdpi.com/2073-4395/12/3/583)
Supplement: s1 [file s1]

**Table S1.** Site, climate type, and host plant information for selected *D. aligarhensis* control sites located in urban areas of southern California, USA.

| Region         | County         | Site name        | Latitude (degrees) | Longitude (degrees) | Elevation (m) | Surveyed tree(s)          |
|----------------|----------------|------------------|--------------------|---------------------|---------------|---------------------------|
| Coastal        | Los Angeles    | Downey           | N33°55'            | W118°07'            | 28            | Grapefruit, Lime          |
|                |                | Los Angeles      | N34°04'            | W118°22'            | 51            | Lemon, Orange             |
|                |                | Malibu           | N34°02'            | W118°43'            | 98            | Lemon, Orange             |
|                | Orange         | Anaheim          | N33°50'            | W117°56'            | 41            | Lemon, Orange             |
|                |                | San Clemente     | N33°25'            | W117°37'            | 36            | Lemon                     |
|                | San Diego      | Escondido        | N33°09'            | W117°07'            | 222           | Lemon, Tangerine          |
|                |                | Mira Mesa        | N32°55'            | W117°08'            | 134           | Tangerine                 |
|                | Ventura        | Newbury Park     | N34°11'            | W118°55'            | 225           | Lemon, Orange             |
|                | Intermediate   | Los Angeles      | Arcadia            | N34°07'             | W118°02'      | 113                       |
| Pomona         |                |                  | N34°04'            | W117°46'            | 264           | Lime, Orange              |
| Orange         |                | Trabuco Canyon   | N33°41'            | W117°38'            | 407           | Lemon                     |
| Riverside      |                | Riverside        | N33°55'            | W117°27'            | 233           | Grapefruit, Orange        |
|                |                | Wildomar         | N33°36'            | W117°13'            | 442           | Tangerine                 |
| San Bernardino |                | Fontana          | N34°06'            | W117°25'            | 375           | Grapefruit, Lime          |
|                |                | San Bernardino   | N34°13'            | W117°24'            | 651           | Grapefruit, Lemon         |
| San Diego      |                | Ramona           | N33°01'            | W116°55'            | 453           | Lemon, Orange             |
| Desert         |                | Imperial         | Brawley*           | N32°59'             | W115°32'      | -33                       |
|                | El Centro*     |                  | N32°47'            | W115°35'            | -9            | Orange                    |
|                | Salton City    |                  | N33°07'            | W115°48'            | -64           | Orange                    |
|                | Riverside      | Beaumont         | N33°56'            | W116°59'            | 796           | Grapefruit, Orange        |
|                |                | Thermal          | N33°34'            | W116°10'            | -21           | Lime                      |
|                | San Bernardino | Redlands         | N34°05'            | W117°10'            | 430           | Lemon, Orange             |
|                | San Diego      | Borrego Springs* | N33°15'            | W116°22'            | 173           | Lemon, Orange             |
|                |                | Potrero          | N32°38'            | W116°38'            | 753           | Grapefruit, Lemon, Orange |

\* Indicates study sites where *T. radiata* activity was not detected in the 2018 surveys. No recoveries were made for *D. aligarhensis* in 2018.
